# Supplementary material for: Nucleoli and the nucleoli–centromere association are dynamic during normal development and in cancer
Source: PubMed Central journal article supplement — Mol Biol Cell. 2023 Mar 7;34(4):br5. doi: 10.1091/mbc.E22-06-0237 (PMC10092642; doi:10.1091/mbc.e22-06-0237), 2023-03-07
Supplement: mbc-34-br5-s001.pdf [file mbc-34-br5-s001.pdf]

Supplementary Materials  
*Molecular Biology of the Cell*  
Rodrigues *et al.*

**Supplemental Materials:**

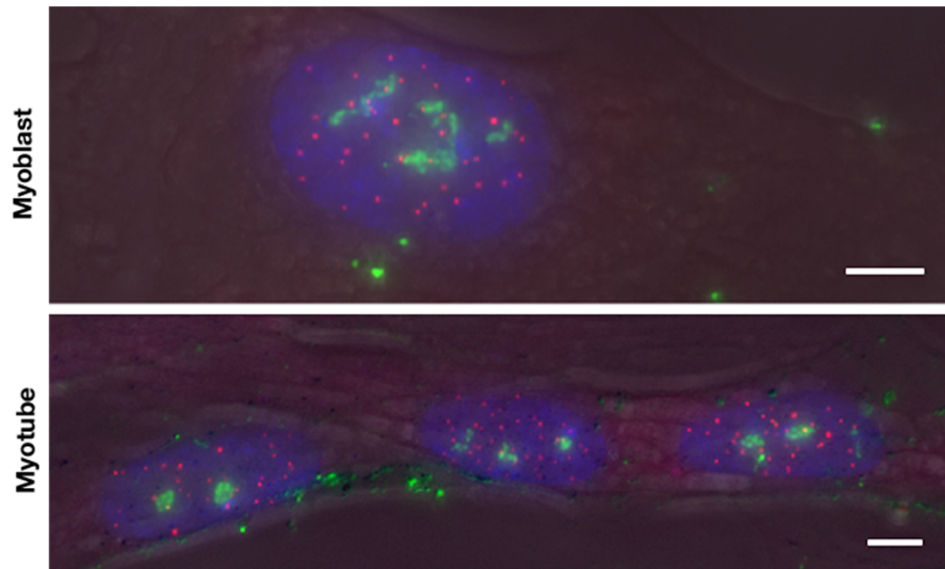

**Supplemental Figure 1.** Differentiated myotubes are those form multi-nuclei tubes. Nucleoli are immunolabeled with anti-Nopp140 antibody (green signals), and centromeres are immunolabeled with anti-CENPA antibody (Red). Only cells in the myotubes were counted as terminally differentiated cells. Bar=0.5 mm

**Human skin**

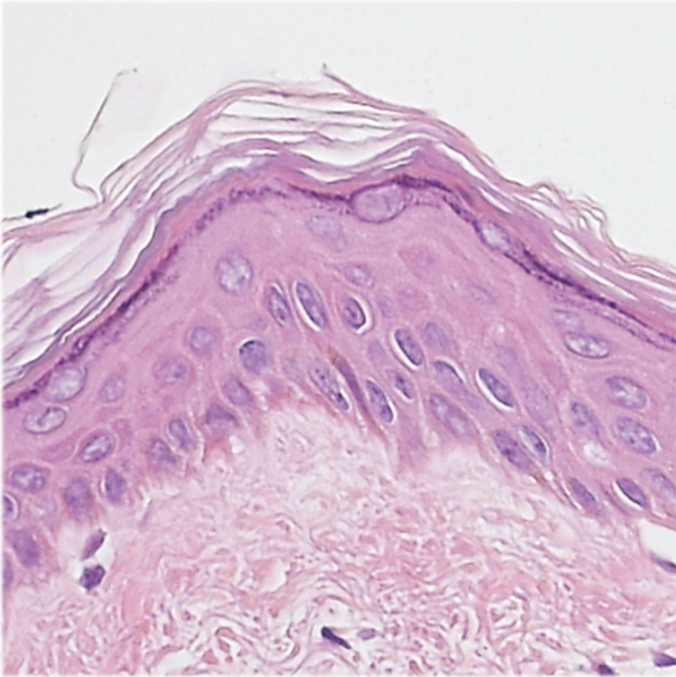

**3D Human skin equivalent**

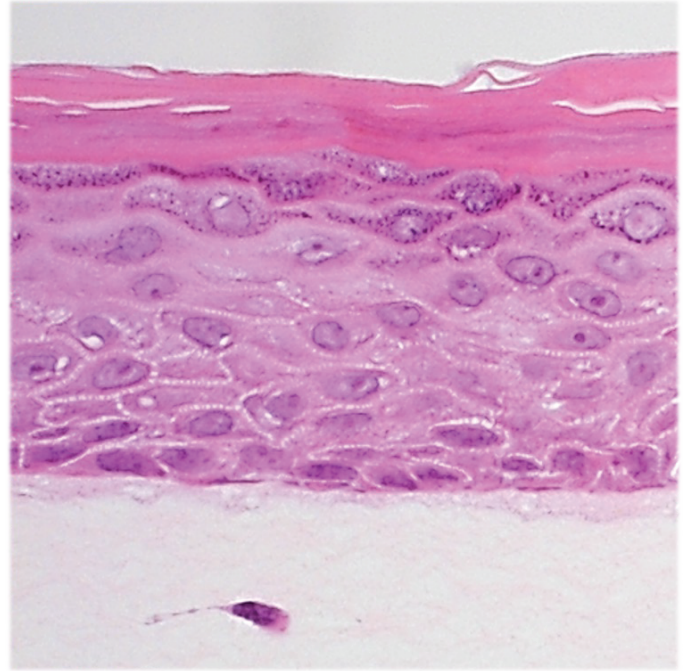

**Supplemental Figure 2.** Representative images of H&E stained normal skin (left) and a 3D human skin equivalent (right) derived from primary human keratinocytes.

| Entrez ID | Gene Symbol | Gene Name                             | Myoblast:Myotube fold difference (log2 value) | p-value  |
|-----------|-------------|---------------------------------------|-----------------------------------------------|----------|
| 79019     | CENPM       | centromere protein M                  | -3.16                                         | 2.02E-22 |
| 55355     | HJURP       | Holliday junction recognition protein | -3.07                                         | 1.76E-21 |
| 1058      | CENPA       | Centromere protein A                  | -2.45                                         | 4.02E-20 |
| 387103    | CENPW       | Centromere protein W                  | -2.35                                         | 3.65E-18 |
| 55839     | CENPN       | Centromere protein N                  | -2.31                                         | 7.67E-19 |
| 11339     | OIP5        | Opa interacting factor 5              | -2.14                                         | 5.05E-18 |
| 1062      | CENPE       | Centromere protein E                  | -1.96                                         | 7.83E-18 |
| 2305      | FOXM1       | Forkhead box M1                       | -1.87                                         | 1.48E-15 |
| 55320     | MIS18BP1    | MIS18 binding protein 1               | -1.83                                         | 1.03E-16 |
| 1063      | CENPF       | Centromere protein F, 350/400 kDA     | -1.77                                         | 1.31E-13 |
| 64105     | CENPK       | Centromere protein K                  | -1.54                                         | 4.85E-15 |
| 1870      | E2F2        | E2F transcription factor 2            | -1.10                                         |          |
| 3619      | INCENP      | Inner centromere protein antigens     | -1.10                                         | 1.68E-12 |
| 54069     | MIS18A      | MIS18 kinetochore protein homolog A   | -1.09                                         | 2.28E-12 |
| 201161    | CENPV       | Centromere protein V                  | -1.07                                         | 2.13E-11 |

**Supplemental Table 1.** Centromere-related genes significantly downregulated with normal myogenesis (from GSE50415).

| Entrez ID | Gene Symbol | Gene Name                             | RD:Myotube fold difference (log2 value) | p-value  |
|-----------|-------------|---------------------------------------|-----------------------------------------|----------|
| 1870      | E2F2        | E2F transcription factor 2            | -3.51                                   | 1.33E-28 |
| 55355     | HJURP       | Holliday junction recognition protein | -3.46                                   | 5.68E-27 |
| 79019     | CENPM       | centromere protein M                  | -3.11                                   | 2.22E-26 |
| 11339     | OIP5        | Opa interacting factor 5              | -2.71                                   |          |
| 1058      | CENPA       | Centromere protein A                  | -2.54                                   | 6.08E-24 |
| 55839     | CENPN       | Centromere protein N                  | -2.35                                   | 1.08E-21 |
| 1063      | CENPF       | Centromere protein F, 350/400 kDA     | -2.20                                   | 2.16E-18 |
| 2305      | FOXM1       | Forkhead box M1                       | -2.11                                   | 3.51E-19 |
| 1062      | CENPE       | Centromere protein E                  | -1.88                                   | 1.07E-20 |
| 201161    | CENPV       | Centromere protein V                  | -1.74                                   | 2.81E-17 |

**Supplemental Table 2.** Centromere-related genes significantly upregulated in RD rhabdomyosarcoma cells compared to normal myotubes (from GSE50415 and GSE35491).
